# Supplementary material for: Novel Pullulan/Gellan Gum Bilayer Film as a Vehicle for Silibinin-Loaded Nanocapsules in the Topical Treatment of Atopic Dermatitis
Source: MDPI journal article supplement (doi:10.3390/pharmaceutics14112352), 2022-10-31
Supplement: s1 [file s1]

## SUPPLEMENTARY MATERIAL

### Novel pullulan/gellan gum bilayer film as a vehicle for silibinin-loaded nanocapsules in topical treatment of atopic dermatitis

Mailine Gehrcke<sup>1</sup>, Carolina Cristóvão Martins<sup>2</sup>, Taíne de Bastos Brum<sup>1</sup>, Lucas Saldanha da Rosa<sup>3</sup>, Cristiane Luchese<sup>2</sup>, Ethel Antunes Wilhelm<sup>2</sup>, Fabio Zovico Maxnuck Soares<sup>3</sup>, Leticia Cruz<sup>1\*</sup>

<sup>1</sup> Laboratório de Tecnologia Farmacêutica, Programa de Pós-graduação em Ciências Farmacêuticas, Centro de Ciências da Saúde, Universidade Federal de Santa Maria, Santa Maria CEP 97105-900, RS, Brazil

<sup>2</sup> Laboratório de Pesquisa em Farmacologia Bioquímica – Centro de Ciências Químicas, Farmacêuticas e de Alimentos, Universidade Federal de Pelotas, Pelotas CEP 96010-900, RS, Brazil

<sup>3</sup> Laboratório de Biomateriais, Centro de Ciências da Saúde, Departamento de Odontologia Restauradora, Universidade Federal de Santa Maria, Santa Maria CEP 97015-372, RS, Brazil

\* Correspondence: leticia.cruz@ufsm.br; Tel.: +55 55 32209373

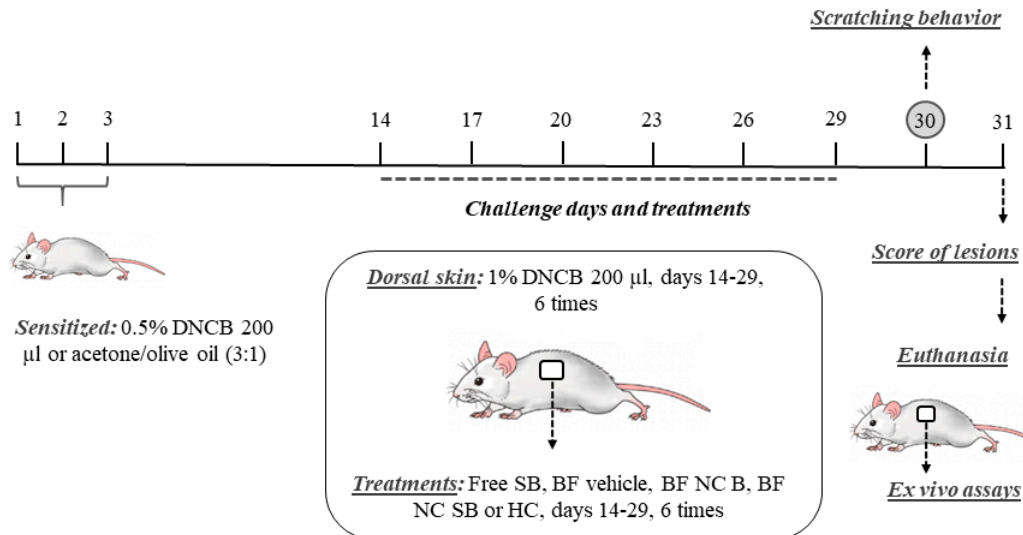

**Figure S1.** Schematic representation of the experimental design of *in vivo* study. DNCB (2, 4-dinitrochlorobenzene); Free SB (free silibinin solution); BF Vehicle (bilayer vehicle film); BF NC B (bilayer film containing unloaded nanocapsules); BF NC SB (bilayer film containing nanoencapsulated silibinin); HC (hydrocortisone ointment).
